# Supplementary material for: Convergence of human and Old World monkey gut microbiomes demonstrates the importance of human ecology over phylogeny
Source: Genome Biol. 2019 Oct 8;20:201. doi: 10.1186/s13059-019-1807-z (PMC6781418; doi:10.1186/s13059-019-1807-z)
Supplement: Supplementary file 4 — Table S4. Shared Metacyc pathways between host taxonomic groups. (XLSX 16 kb) [file 13059_2019_1807_MOESM4_ESM.xlsx]

## Sheet: Sheet1
Table S4: Shared Metacyc pathways between host taxonomic groups based on shotgun metagenomic sequencing. All pathways detected in all human populations and non-human primate species included for each comparison.
Non-Industrialized Human-Ape		Non-Industrialized Human-Cercopithecine		Only Non-Industrialized Human-Cercopithecine		Non-industrialized Human-Baboon			All Human-Ape		All Human-Cercopithecine		Only Human-Cercopithecine		Human-Baboon
1CMET2-PWY: N10-formyl-tetrahydrofolate biosynthesis|unclassified		1CMET2-PWY: N10-formyl-tetrahydrofolate biosynthesis|unclassified		ANAGLYCOLYSIS-PWY: glycolysis III (from glucose)|g__Faecalibacterium.s__Faecalibacterium_prausnitzii		1CMET2-PWY: N10-formyl-tetrahydrofolate biosynthesis|unclassified			1CMET2-PWY: N10-formyl-tetrahydrofolate biosynthesis|unclassified		1CMET2-PWY: N10-formyl-tetrahydrofolate biosynthesis|unclassified		ANAGLYCOLYSIS-PWY: glycolysis III (from glucose)|g__Faecalibacterium.s__Faecalibacterium_prausnitzii		1CMET2-PWY: N10-formyl-tetrahydrofolate biosynthesis|unclassified
ANAGLYCOLYSIS-PWY: glycolysis III (from glucose)|unclassified		ANAGLYCOLYSIS-PWY: glycolysis III (from glucose)|unclassified		BRANCHED-CHAIN-AA-SYN-PWY: superpathway of branched amino acid biosynthesis|g__Faecalibacterium.s__Faecalibacterium_prausnitzii		ANAGLYCOLYSIS-PWY: glycolysis III (from glucose)|g__Faecalibacterium.s__Faecalibacterium_prausnitzii			ANAGLYCOLYSIS-PWY: glycolysis III (from glucose)|unclassified		ANAGLYCOLYSIS-PWY: glycolysis III (from glucose)|unclassified		BRANCHED-CHAIN-AA-SYN-PWY: superpathway of branched amino acid biosynthesis|g__Faecalibacterium.s__Faecalibacterium_prausnitzii		ANAGLYCOLYSIS-PWY: glycolysis III (from glucose)|g__Faecalibacterium.s__Faecalibacterium_prausnitzii
ARGININE-SYN4-PWY: L-ornithine de novo biosynthesis|unclassified		ARGININE-SYN4-PWY: L-ornithine de novo biosynthesis|unclassified		CALVIN-PWY: Calvin-Benson-Bassham cycle|g__Faecalibacterium.s__Faecalibacterium_prausnitzii		ANAGLYCOLYSIS-PWY: glycolysis III (from glucose)|unclassified			ARGININE-SYN4-PWY: L-ornithine de novo biosynthesis|unclassified		ARGININE-SYN4-PWY: L-ornithine de novo biosynthesis|unclassified		CALVIN-PWY: Calvin-Benson-Bassham cycle|g__Faecalibacterium.s__Faecalibacterium_prausnitzii		ANAGLYCOLYSIS-PWY: glycolysis III (from glucose)|unclassified
ARGSYN-PWY: L-arginine biosynthesis I (via L-ornithine)|unclassified		ARGSYN-PWY: L-arginine biosynthesis I (via L-ornithine)|unclassified		DTDPRHAMSYN-PWY: dTDP-L-rhamnose biosynthesis I|g__Faecalibacterium.s__Faecalibacterium_prausnitzii		ARGININE-SYN4-PWY: L-ornithine de novo biosynthesis|unclassified			ARGSYN-PWY: L-arginine biosynthesis I (via L-ornithine)|unclassified		ARGSYN-PWY: L-arginine biosynthesis I (via L-ornithine)|unclassified		DTDPRHAMSYN-PWY: dTDP-L-rhamnose biosynthesis I|g__Faecalibacterium.s__Faecalibacterium_prausnitzii		ARGININE-SYN4-PWY: L-ornithine de novo biosynthesis|unclassified
ARO-PWY: chorismate biosynthesis I|unclassified		ARO-PWY: chorismate biosynthesis I|unclassified		GALACTUROCAT-PWY: D-galacturonate degradation I|g__Faecalibacterium.s__Faecalibacterium_prausnitzii		ARGSYN-PWY: L-arginine biosynthesis I (via L-ornithine)|unclassified			ARGSYNBSUB-PWY: L-arginine biosynthesis II (acetyl cycle)|unclassified		ARGSYNBSUB-PWY: L-arginine biosynthesis II (acetyl cycle)|unclassified		GALACTUROCAT-PWY: D-galacturonate degradation I|g__Faecalibacterium.s__Faecalibacterium_prausnitzii		ARGSYN-PWY: L-arginine biosynthesis I (via L-ornithine)|unclassified
BRANCHED-CHAIN-AA-SYN-PWY: superpathway of branched amino acid biosynthesis|unclassified		BRANCHED-CHAIN-AA-SYN-PWY: superpathway of branched amino acid biosynthesis|unclassified		HISTSYN-PWY: L-histidine biosynthesis|g__Faecalibacterium.s__Faecalibacterium_prausnitzii		ARGSYNBSUB-PWY: L-arginine biosynthesis II (acetyl cycle)|unclassified			ARO-PWY: chorismate biosynthesis I|unclassified		ARO-PWY: chorismate biosynthesis I|unclassified		HISTSYN-PWY: L-histidine biosynthesis|g__Faecalibacterium.s__Faecalibacterium_prausnitzii		ARGSYNBSUB-PWY: L-arginine biosynthesis II (acetyl cycle)|unclassified
CALVIN-PWY: Calvin-Benson-Bassham cycle|unclassified		CALVIN-PWY: Calvin-Benson-Bassham cycle|unclassified		ILEUSYN-PWY: L-isoleucine biosynthesis I (from threonine)|g__Faecalibacterium.s__Faecalibacterium_prausnitzii		ARO-PWY: chorismate biosynthesis I|unclassified			ASPASN-PWY: superpathway of L-aspartate and L-asparagine biosynthesis|unclassified		ASPASN-PWY: superpathway of L-aspartate and L-asparagine biosynthesis|unclassified		ILEUSYN-PWY: L-isoleucine biosynthesis I (from threonine)|g__Faecalibacterium.s__Faecalibacterium_prausnitzii		ARO-PWY: chorismate biosynthesis I|unclassified
COA-PWY-1: coenzyme A biosynthesis II (mammalian)|unclassified		COA-PWY-1: coenzyme A biosynthesis II (mammalian)|unclassified		PWY-1042: glycolysis IV (plant cytosol)|g__Faecalibacterium.s__Faecalibacterium_prausnitzii		ASPASN-PWY: superpathway of L-aspartate and L-asparagine biosynthesis|unclassified			BRANCHED-CHAIN-AA-SYN-PWY: superpathway of branched amino acid biosynthesis|unclassified		BRANCHED-CHAIN-AA-SYN-PWY: superpathway of branched amino acid biosynthesis|unclassified		PWY-1042: glycolysis IV (plant cytosol)|g__Faecalibacterium.s__Faecalibacterium_prausnitzii		ASPASN-PWY: superpathway of L-aspartate and L-asparagine biosynthesis|unclassified
COA-PWY: coenzyme A biosynthesis I|unclassified		COA-PWY: coenzyme A biosynthesis I|unclassified		PWY-5097: L-lysine biosynthesis VI|g__Faecalibacterium.s__Faecalibacterium_prausnitzii		BRANCHED-CHAIN-AA-SYN-PWY: superpathway of branched amino acid biosynthesis|g__Faecalibacterium.s__Faecalibacterium_prausnitzii			CALVIN-PWY: Calvin-Benson-Bassham cycle|unclassified		CALVIN-PWY: Calvin-Benson-Bassham cycle|unclassified		PWY-5097: L-lysine biosynthesis VI|g__Faecalibacterium.s__Faecalibacterium_prausnitzii		BRANCHED-CHAIN-AA-SYN-PWY: superpathway of branched amino acid biosynthesis|g__Faecalibacterium.s__Faecalibacterium_prausnitzii
COMPLETE-ARO-PWY: superpathway of aromatic amino acid biosynthesis|unclassified		COMPLETE-ARO-PWY: superpathway of aromatic amino acid biosynthesis|unclassified		PWY-5103: L-isoleucine biosynthesis III|g__Faecalibacterium.s__Faecalibacterium_prausnitzii		BRANCHED-CHAIN-AA-SYN-PWY: superpathway of branched amino acid biosynthesis|unclassified			COA-PWY-1: coenzyme A biosynthesis II (mammalian)|unclassified		COA-PWY-1: coenzyme A biosynthesis II (mammalian)|unclassified		PWY-5103: L-isoleucine biosynthesis III|g__Faecalibacterium.s__Faecalibacterium_prausnitzii		BRANCHED-CHAIN-AA-SYN-PWY: superpathway of branched amino acid biosynthesis|unclassified
DTDPRHAMSYN-PWY: dTDP-L-rhamnose biosynthesis I|unclassified		DTDPRHAMSYN-PWY: dTDP-L-rhamnose biosynthesis I|unclassified		PWY-5177: glutaryl-CoA degradation|g__Faecalibacterium.s__Faecalibacterium_prausnitzii		CALVIN-PWY: Calvin-Benson-Bassham cycle|g__Faecalibacterium.s__Faecalibacterium_prausnitzii			COA-PWY: coenzyme A biosynthesis I|unclassified		COA-PWY: coenzyme A biosynthesis I|unclassified		PWY-5177: glutaryl-CoA degradation|g__Faecalibacterium.s__Faecalibacterium_prausnitzii		CALVIN-PWY: Calvin-Benson-Bassham cycle|g__Faecalibacterium.s__Faecalibacterium_prausnitzii
FASYN-INITIAL-PWY: superpathway of fatty acid biosynthesis initiation (E. coli)|unclassified		FASYN-INITIAL-PWY: superpathway of fatty acid biosynthesis initiation (E. coli)|unclassified		PWY-5667: CDP-diacylglycerol biosynthesis I|g__Faecalibacterium.s__Faecalibacterium_prausnitzii		CALVIN-PWY: Calvin-Benson-Bassham cycle|unclassified			COMPLETE-ARO-PWY: superpathway of aromatic amino acid biosynthesis|unclassified		COMPLETE-ARO-PWY: superpathway of aromatic amino acid biosynthesis|unclassified		PWY-5667: CDP-diacylglycerol biosynthesis I|g__Faecalibacterium.s__Faecalibacterium_prausnitzii		CALVIN-PWY: Calvin-Benson-Bassham cycle|unclassified
GLUCONEO-PWY: gluconeogenesis I|unclassified		GLUCONEO-PWY: gluconeogenesis I|unclassified		PWY-5686: UMP biosynthesis|g__Faecalibacterium.s__Faecalibacterium_prausnitzii		CENTFERM-PWY: pyruvate fermentation to butanoate|unclassified			DTDPRHAMSYN-PWY: dTDP-L-rhamnose biosynthesis I|unclassified		DTDPRHAMSYN-PWY: dTDP-L-rhamnose biosynthesis I|unclassified		PWY-5686: UMP biosynthesis|g__Faecalibacterium.s__Faecalibacterium_prausnitzii		COA-PWY-1: coenzyme A biosynthesis II (mammalian)|unclassified
GLUCUROCAT-PWY: superpathway of &beta;-D-glucuronide and D-glucuronate degradation|unclassified		GLUCUROCAT-PWY: superpathway of &beta;-D-glucuronide and D-glucuronate degradation|unclassified		PWY-6121: 5-aminoimidazole ribonucleotide biosynthesis I|g__Faecalibacterium.s__Faecalibacterium_prausnitzii		COA-PWY-1: coenzyme A biosynthesis II (mammalian)|g__Faecalibacterium.s__Faecalibacterium_prausnitzii			FASYN-ELONG-PWY: fatty acid elongation -- saturated|unclassified		FASYN-ELONG-PWY: fatty acid elongation -- saturated|unclassified		PWY-6121: 5-aminoimidazole ribonucleotide biosynthesis I|g__Faecalibacterium.s__Faecalibacterium_prausnitzii		COA-PWY: coenzyme A biosynthesis I|unclassified
GLUTORN-PWY: L-ornithine biosynthesis|unclassified		GLUTORN-PWY: L-ornithine biosynthesis|unclassified		PWY-6122: 5-aminoimidazole ribonucleotide biosynthesis II|g__Faecalibacterium.s__Faecalibacterium_prausnitzii		COA-PWY-1: coenzyme A biosynthesis II (mammalian)|unclassified			FASYN-INITIAL-PWY: superpathway of fatty acid biosynthesis initiation (E. coli)|unclassified		FASYN-INITIAL-PWY: superpathway of fatty acid biosynthesis initiation (E. coli)|unclassified		PWY-6122: 5-aminoimidazole ribonucleotide biosynthesis II|g__Faecalibacterium.s__Faecalibacterium_prausnitzii		COMPLETE-ARO-PWY: superpathway of aromatic amino acid biosynthesis|unclassified
HISTSYN-PWY: L-histidine biosynthesis|unclassified		HISTSYN-PWY: L-histidine biosynthesis|unclassified		PWY-6277: superpathway of 5-aminoimidazole ribonucleotide biosynthesis|g__Faecalibacterium.s__Faecalibacterium_prausnitzii		COA-PWY: coenzyme A biosynthesis I|g__Faecalibacterium.s__Faecalibacterium_prausnitzii			GLUCONEO-PWY: gluconeogenesis I|unclassified		GLUCONEO-PWY: gluconeogenesis I|unclassified		PWY-6277: superpathway of 5-aminoimidazole ribonucleotide biosynthesis|g__Faecalibacterium.s__Faecalibacterium_prausnitzii		DTDPRHAMSYN-PWY: dTDP-L-rhamnose biosynthesis I|g__Faecalibacterium.s__Faecalibacterium_prausnitzii
HOMOSER-METSYN-PWY: L-methionine biosynthesis I|unclassified		HOMOSER-METSYN-PWY: L-methionine biosynthesis I|unclassified		PWY-6317: galactose degradation I (Leloir pathway)|g__Faecalibacterium.s__Faecalibacterium_prausnitzii		COA-PWY: coenzyme A biosynthesis I|unclassified			GLUCUROCAT-PWY: superpathway of &beta;-D-glucuronide and D-glucuronate degradation|unclassified		GLUCUROCAT-PWY: superpathway of &beta;-D-glucuronide and D-glucuronate degradation|unclassified		PWY-6317: galactose degradation I (Leloir pathway)|g__Faecalibacterium.s__Faecalibacterium_prausnitzii		DTDPRHAMSYN-PWY: dTDP-L-rhamnose biosynthesis I|unclassified
HSERMETANA-PWY: L-methionine biosynthesis III|unclassified		HSERMETANA-PWY: L-methionine biosynthesis III|unclassified		PWY-6387: UDP-N-acetylmuramoyl-pentapeptide biosynthesis I (meso-diaminopimelate containing)|g__Faecalibacterium.s__Faecalibacterium_prausnitzii		COBALSYN-PWY: adenosylcobalamin salvage from cobinamide I|unclassified			GLUTORN-PWY: L-ornithine biosynthesis|unclassified		GLUTORN-PWY: L-ornithine biosynthesis|unclassified		PWY-6387: UDP-N-acetylmuramoyl-pentapeptide biosynthesis I (meso-diaminopimelate containing)|g__Faecalibacterium.s__Faecalibacterium_prausnitzii		FASYN-ELONG-PWY: fatty acid elongation -- saturated|unclassified
ILEUSYN-PWY: L-isoleucine biosynthesis I (from threonine)|unclassified		ILEUSYN-PWY: L-isoleucine biosynthesis I (from threonine)|unclassified		PWY-6737: starch degradation V|g__Faecalibacterium.s__Faecalibacterium_prausnitzii		COMPLETE-ARO-PWY: superpathway of aromatic amino acid biosynthesis|unclassified			GLYCOGENSYNTH-PWY: glycogen biosynthesis I (from ADP-D-Glucose)|unclassified		GLYCOGENSYNTH-PWY: glycogen biosynthesis I (from ADP-D-Glucose)|unclassified		PWY-6737: starch degradation V|g__Faecalibacterium.s__Faecalibacterium_prausnitzii		FASYN-INITIAL-PWY: superpathway of fatty acid biosynthesis initiation (E. coli)|unclassified
MET-SAM-PWY: superpathway of S-adenosyl-L-methionine biosynthesis|unclassified		MET-SAM-PWY: superpathway of S-adenosyl-L-methionine biosynthesis|unclassified		PWY-7111: pyruvate fermentation to isobutanol (engineered)|g__Faecalibacterium.s__Faecalibacterium_prausnitzii		DTDPRHAMSYN-PWY: dTDP-L-rhamnose biosynthesis I|g__Faecalibacterium.s__Faecalibacterium_prausnitzii			HISTSYN-PWY: L-histidine biosynthesis|unclassified		HISTSYN-PWY: L-histidine biosynthesis|unclassified		PWY-7111: pyruvate fermentation to isobutanol (engineered)|g__Faecalibacterium.s__Faecalibacterium_prausnitzii		GALACTUROCAT-PWY: D-galacturonate degradation I|g__Faecalibacterium.s__Faecalibacterium_prausnitzii
METSYN-PWY: L-homoserine and L-methionine biosynthesis|unclassified		METSYN-PWY: L-homoserine and L-methionine biosynthesis|unclassified		PWY-7219: adenosine ribonucleotides de novo biosynthesis|g__Faecalibacterium.s__Faecalibacterium_prausnitzii		DTDPRHAMSYN-PWY: dTDP-L-rhamnose biosynthesis I|unclassified			HOMOSER-METSYN-PWY: L-methionine biosynthesis I|unclassified		HOMOSER-METSYN-PWY: L-methionine biosynthesis I|unclassified		PWY-7219: adenosine ribonucleotides de novo biosynthesis|g__Faecalibacterium.s__Faecalibacterium_prausnitzii		GLUCONEO-PWY: gluconeogenesis I|unclassified
NONMEVIPP-PWY: methylerythritol phosphate pathway I|unclassified		NONMEVIPP-PWY: methylerythritol phosphate pathway I|unclassified		PWY0-1296: purine ribonucleosides degradation|g__Faecalibacterium.s__Faecalibacterium_prausnitzii		FASYN-ELONG-PWY: fatty acid elongation -- saturated|unclassified			HSERMETANA-PWY: L-methionine biosynthesis III|unclassified		HSERMETANA-PWY: L-methionine biosynthesis III|unclassified		PWY0-1296: purine ribonucleosides degradation|g__Faecalibacterium.s__Faecalibacterium_prausnitzii		GLUCUROCAT-PWY: superpathway of &beta;-D-glucuronide and D-glucuronate degradation|unclassified
NONOXIPENT-PWY: pentose phosphate pathway (non-oxidative branch)|unclassified		NONOXIPENT-PWY: pentose phosphate pathway (non-oxidative branch)|unclassified		PWY0-1319: CDP-diacylglycerol biosynthesis II|g__Faecalibacterium.s__Faecalibacterium_prausnitzii		FASYN-INITIAL-PWY: superpathway of fatty acid biosynthesis initiation (E. coli)|unclassified			ILEUSYN-PWY: L-isoleucine biosynthesis I (from threonine)|unclassified		ILEUSYN-PWY: L-isoleucine biosynthesis I (from threonine)|unclassified		PWY0-1319: CDP-diacylglycerol biosynthesis II|g__Faecalibacterium.s__Faecalibacterium_prausnitzii		GLUTORN-PWY: L-ornithine biosynthesis|unclassified
P124-PWY: Bifidobacterium shunt|unclassified		P124-PWY: Bifidobacterium shunt|unclassified		PWY66-422: D-galactose degradation V (Leloir pathway)|g__Faecalibacterium.s__Faecalibacterium_prausnitzii		GALACTUROCAT-PWY: D-galacturonate degradation I|g__Faecalibacterium.s__Faecalibacterium_prausnitzii			MET-SAM-PWY: superpathway of S-adenosyl-L-methionine biosynthesis|unclassified		MET-SAM-PWY: superpathway of S-adenosyl-L-methionine biosynthesis|unclassified		PWY66-422: D-galactose degradation V (Leloir pathway)|g__Faecalibacterium.s__Faecalibacterium_prausnitzii		GLYCOGENSYNTH-PWY: glycogen biosynthesis I (from ADP-D-Glucose)|unclassified
P161-PWY: acetylene degradation|unclassified		P161-PWY: acetylene degradation|unclassified		UNINTEGRATED|g__Faecalibacterium.s__Faecalibacterium_prausnitzii		GALACTUROCAT-PWY: D-galacturonate degradation I|unclassified			METSYN-PWY: L-homoserine and L-methionine biosynthesis|unclassified		METSYN-PWY: L-homoserine and L-methionine biosynthesis|unclassified		UNINTEGRATED|g__Faecalibacterium.s__Faecalibacterium_prausnitzii		HISTSYN-PWY: L-histidine biosynthesis|g__Faecalibacterium.s__Faecalibacterium_prausnitzii
P185-PWY: formaldehyde assimilation III (dihydroxyacetone cycle)|unclassified		P185-PWY: formaldehyde assimilation III (dihydroxyacetone cycle)|unclassified		VALSYN-PWY: L-valine biosynthesis|g__Faecalibacterium.s__Faecalibacterium_prausnitzii		GLUCONEO-PWY: gluconeogenesis I|unclassified			NONMEVIPP-PWY: methylerythritol phosphate pathway I|unclassified		NONMEVIPP-PWY: methylerythritol phosphate pathway I|unclassified		VALSYN-PWY: L-valine biosynthesis|g__Faecalibacterium.s__Faecalibacterium_prausnitzii		HISTSYN-PWY: L-histidine biosynthesis|unclassified
PANTO-PWY: phosphopantothenate biosynthesis I|unclassified		PANTO-PWY: phosphopantothenate biosynthesis I|unclassified				GLUCUROCAT-PWY: superpathway of &beta;-D-glucuronide and D-glucuronate degradation|unclassified			NONOXIPENT-PWY: pentose phosphate pathway (non-oxidative branch)|unclassified		NONOXIPENT-PWY: pentose phosphate pathway (non-oxidative branch)|unclassified				HOMOSER-METSYN-PWY: L-methionine biosynthesis I|unclassified
PANTOSYN-PWY: pantothenate and coenzyme A biosynthesis I|unclassified		PANTOSYN-PWY: pantothenate and coenzyme A biosynthesis I|unclassified				GLUTORN-PWY: L-ornithine biosynthesis|unclassified			P124-PWY: Bifidobacterium shunt|unclassified		P124-PWY: Bifidobacterium shunt|unclassified				HSERMETANA-PWY: L-methionine biosynthesis III|unclassified
PEPTIDOGLYCANSYN-PWY: peptidoglycan biosynthesis I (meso-diaminopimelate containing)|unclassified		PEPTIDOGLYCANSYN-PWY: peptidoglycan biosynthesis I (meso-diaminopimelate containing)|unclassified				GLYCOGENSYNTH-PWY: glycogen biosynthesis I (from ADP-D-Glucose)|unclassified			P161-PWY: acetylene degradation|unclassified		P161-PWY: acetylene degradation|unclassified				ILEUSYN-PWY: L-isoleucine biosynthesis I (from threonine)|g__Faecalibacterium.s__Faecalibacterium_prausnitzii
PWY-1042: glycolysis IV (plant cytosol)|unclassified		PWY-1042: glycolysis IV (plant cytosol)|unclassified				HISTSYN-PWY: L-histidine biosynthesis|g__Faecalibacterium.s__Faecalibacterium_prausnitzii			P185-PWY: formaldehyde assimilation III (dihydroxyacetone cycle)|unclassified		P185-PWY: formaldehyde assimilation III (dihydroxyacetone cycle)|unclassified				ILEUSYN-PWY: L-isoleucine biosynthesis I (from threonine)|unclassified
PWY-2942: L-lysine biosynthesis III|unclassified		PWY-2942: L-lysine biosynthesis III|unclassified				HISTSYN-PWY: L-histidine biosynthesis|unclassified			PANTO-PWY: phosphopantothenate biosynthesis I|unclassified		PANTO-PWY: phosphopantothenate biosynthesis I|unclassified				MET-SAM-PWY: superpathway of S-adenosyl-L-methionine biosynthesis|unclassified
PWY-3001: superpathway of L-isoleucine biosynthesis I|unclassified		PWY-3001: superpathway of L-isoleucine biosynthesis I|unclassified				HOMOSER-METSYN-PWY: L-methionine biosynthesis I|unclassified			PANTOSYN-PWY: pantothenate and coenzyme A biosynthesis I|unclassified		PANTOSYN-PWY: pantothenate and coenzyme A biosynthesis I|unclassified				METSYN-PWY: L-homoserine and L-methionine biosynthesis|unclassified
PWY-3841: folate transformations II|unclassified		PWY-3841: folate transformations II|unclassified				HSERMETANA-PWY: L-methionine biosynthesis III|unclassified			PEPTIDOGLYCANSYN-PWY: peptidoglycan biosynthesis I (meso-diaminopimelate containing)|unclassified		PEPTIDOGLYCANSYN-PWY: peptidoglycan biosynthesis I (meso-diaminopimelate containing)|unclassified				NONMEVIPP-PWY: methylerythritol phosphate pathway I|unclassified
PWY-5097: L-lysine biosynthesis VI|unclassified		PWY-5097: L-lysine biosynthesis VI|unclassified				ILEUSYN-PWY: L-isoleucine biosynthesis I (from threonine)|g__Faecalibacterium.s__Faecalibacterium_prausnitzii			PWY-1042: glycolysis IV (plant cytosol)|unclassified		PWY-1042: glycolysis IV (plant cytosol)|unclassified				NONOXIPENT-PWY: pentose phosphate pathway (non-oxidative branch)|unclassified
PWY-5100: pyruvate fermentation to acetate and lactate II|unclassified		PWY-5100: pyruvate fermentation to acetate and lactate II|unclassified				ILEUSYN-PWY: L-isoleucine biosynthesis I (from threonine)|unclassified			PWY-2942: L-lysine biosynthesis III|unclassified		PWY-2942: L-lysine biosynthesis III|unclassified				P124-PWY: Bifidobacterium shunt|unclassified
PWY-5103: L-isoleucine biosynthesis III|unclassified		PWY-5103: L-isoleucine biosynthesis III|unclassified				LACTOSECAT-PWY: lactose and galactose degradation I|unclassified			PWY-3001: superpathway of L-isoleucine biosynthesis I|unclassified		PWY-3001: superpathway of L-isoleucine biosynthesis I|unclassified				P161-PWY: acetylene degradation|unclassified
PWY-5104: L-isoleucine biosynthesis IV|unclassified		PWY-5104: L-isoleucine biosynthesis IV|unclassified				MET-SAM-PWY: superpathway of S-adenosyl-L-methionine biosynthesis|unclassified			PWY-3841: folate transformations II|unclassified		PWY-3841: folate transformations II|unclassified				P185-PWY: formaldehyde assimilation III (dihydroxyacetone cycle)|unclassified
PWY-5177: glutaryl-CoA degradation|unclassified		PWY-5177: glutaryl-CoA degradation|unclassified				METSYN-PWY: L-homoserine and L-methionine biosynthesis|unclassified			PWY-5097: L-lysine biosynthesis VI|unclassified		PWY-5097: L-lysine biosynthesis VI|unclassified				PANTO-PWY: phosphopantothenate biosynthesis I|unclassified
PWY-5347: superpathway of L-methionine biosynthesis (transsulfuration)|unclassified		PWY-5347: superpathway of L-methionine biosynthesis (transsulfuration)|unclassified				NONMEVIPP-PWY: methylerythritol phosphate pathway I|unclassified			PWY-5100: pyruvate fermentation to acetate and lactate II|unclassified		PWY-5100: pyruvate fermentation to acetate and lactate II|unclassified				PANTOSYN-PWY: pantothenate and coenzyme A biosynthesis I|unclassified
PWY-5505: L-glutamate and L-glutamine biosynthesis|unclassified		PWY-5505: L-glutamate and L-glutamine biosynthesis|unclassified				NONOXIPENT-PWY: pentose phosphate pathway (non-oxidative branch)|unclassified			PWY-5103: L-isoleucine biosynthesis III|unclassified		PWY-5103: L-isoleucine biosynthesis III|unclassified				PEPTIDOGLYCANSYN-PWY: peptidoglycan biosynthesis I (meso-diaminopimelate containing)|g__Faecalibacterium.s__Faecalibacterium_prausnitzii
PWY-5659: GDP-mannose biosynthesis|unclassified		PWY-5659: GDP-mannose biosynthesis|unclassified				P124-PWY: Bifidobacterium shunt|unclassified			PWY-5104: L-isoleucine biosynthesis IV|unclassified		PWY-5104: L-isoleucine biosynthesis IV|unclassified				PEPTIDOGLYCANSYN-PWY: peptidoglycan biosynthesis I (meso-diaminopimelate containing)|unclassified
PWY-5667: CDP-diacylglycerol biosynthesis I|unclassified		PWY-5667: CDP-diacylglycerol biosynthesis I|unclassified				P161-PWY: acetylene degradation|unclassified			PWY-5177: glutaryl-CoA degradation|unclassified		PWY-5177: glutaryl-CoA degradation|unclassified				PWY-1042: glycolysis IV (plant cytosol)|g__Faecalibacterium.s__Faecalibacterium_prausnitzii
PWY-5686: UMP biosynthesis|unclassified		PWY-5686: UMP biosynthesis|unclassified				P185-PWY: formaldehyde assimilation III (dihydroxyacetone cycle)|unclassified			PWY-5347: superpathway of L-methionine biosynthesis (transsulfuration)|unclassified		PWY-5347: superpathway of L-methionine biosynthesis (transsulfuration)|unclassified				PWY-1042: glycolysis IV (plant cytosol)|unclassified
PWY-5695: urate biosynthesis/inosine 5'-phosphate degradation|unclassified		PWY-5695: urate biosynthesis/inosine 5'-phosphate degradation|unclassified				PANTO-PWY: phosphopantothenate biosynthesis I|unclassified			PWY-5505: L-glutamate and L-glutamine biosynthesis|unclassified		PWY-5505: L-glutamate and L-glutamine biosynthesis|unclassified				PWY-2942: L-lysine biosynthesis III|unclassified
PWY-5973: cis-vaccenate biosynthesis|unclassified		PWY-5973: cis-vaccenate biosynthesis|unclassified				PANTOSYN-PWY: pantothenate and coenzyme A biosynthesis I|unclassified			PWY-5659: GDP-mannose biosynthesis|unclassified		PWY-5659: GDP-mannose biosynthesis|unclassified				PWY-3001: superpathway of L-isoleucine biosynthesis I|unclassified
PWY-6121: 5-aminoimidazole ribonucleotide biosynthesis I|unclassified		PWY-6121: 5-aminoimidazole ribonucleotide biosynthesis I|unclassified				PEPTIDOGLYCANSYN-PWY: peptidoglycan biosynthesis I (meso-diaminopimelate containing)|g__Faecalibacterium.s__Faecalibacterium_prausnitzii			PWY-5667: CDP-diacylglycerol biosynthesis I|unclassified		PWY-5667: CDP-diacylglycerol biosynthesis I|unclassified				PWY-3841: folate transformations II|unclassified
PWY-6122: 5-aminoimidazole ribonucleotide biosynthesis II|unclassified		PWY-6122: 5-aminoimidazole ribonucleotide biosynthesis II|unclassified				PEPTIDOGLYCANSYN-PWY: peptidoglycan biosynthesis I (meso-diaminopimelate containing)|unclassified			PWY-5686: UMP biosynthesis|unclassified		PWY-5686: UMP biosynthesis|unclassified				PWY-5097: L-lysine biosynthesis VI|g__Faecalibacterium.s__Faecalibacterium_prausnitzii
PWY-6151: S-adenosyl-L-methionine cycle I|unclassified		PWY-6151: S-adenosyl-L-methionine cycle I|unclassified				PWY-1042: glycolysis IV (plant cytosol)|g__Bacteroides.s__Bacteroides_uniformis			PWY-5695: urate biosynthesis/inosine 5'-phosphate degradation|unclassified		PWY-5695: urate biosynthesis/inosine 5'-phosphate degradation|unclassified				PWY-5097: L-lysine biosynthesis VI|unclassified
PWY-6163: chorismate biosynthesis from 3-dehydroquinate|unclassified		PWY-6163: chorismate biosynthesis from 3-dehydroquinate|unclassified				PWY-1042: glycolysis IV (plant cytosol)|g__Eubacterium.s__Eubacterium_rectale			PWY-5973: cis-vaccenate biosynthesis|unclassified		PWY-5973: cis-vaccenate biosynthesis|unclassified				PWY-5100: pyruvate fermentation to acetate and lactate II|unclassified
PWY-6277: superpathway of 5-aminoimidazole ribonucleotide biosynthesis|unclassified		PWY-6277: superpathway of 5-aminoimidazole ribonucleotide biosynthesis|unclassified				PWY-1042: glycolysis IV (plant cytosol)|g__Faecalibacterium.s__Faecalibacterium_prausnitzii			PWY-6121: 5-aminoimidazole ribonucleotide biosynthesis I|unclassified		PWY-6121: 5-aminoimidazole ribonucleotide biosynthesis I|unclassified				PWY-5103: L-isoleucine biosynthesis III|g__Faecalibacterium.s__Faecalibacterium_prausnitzii
PWY-6317: galactose degradation I (Leloir pathway)|unclassified		PWY-6317: galactose degradation I (Leloir pathway)|unclassified				PWY-1042: glycolysis IV (plant cytosol)|unclassified			PWY-6122: 5-aminoimidazole ribonucleotide biosynthesis II|unclassified		PWY-6122: 5-aminoimidazole ribonucleotide biosynthesis II|unclassified				PWY-5103: L-isoleucine biosynthesis III|unclassified
PWY-6385: peptidoglycan biosynthesis III (mycobacteria)|unclassified		PWY-6385: peptidoglycan biosynthesis III (mycobacteria)|unclassified				PWY-2942: L-lysine biosynthesis III|unclassified			PWY-6123: inosine-5'-phosphate biosynthesis I|unclassified		PWY-6123: inosine-5'-phosphate biosynthesis I|unclassified				PWY-5104: L-isoleucine biosynthesis IV|unclassified
PWY-6386: UDP-N-acetylmuramoyl-pentapeptide biosynthesis II (lysine-containing)|unclassified		PWY-6386: UDP-N-acetylmuramoyl-pentapeptide biosynthesis II (lysine-containing)|unclassified				PWY-3001: superpathway of L-isoleucine biosynthesis I|unclassified			PWY-6124: inosine-5'-phosphate biosynthesis II|unclassified		PWY-6124: inosine-5'-phosphate biosynthesis II|unclassified				PWY-5177: glutaryl-CoA degradation|g__Faecalibacterium.s__Faecalibacterium_prausnitzii
PWY-6387: UDP-N-acetylmuramoyl-pentapeptide biosynthesis I (meso-diaminopimelate containing)|unclassified		PWY-6387: UDP-N-acetylmuramoyl-pentapeptide biosynthesis I (meso-diaminopimelate containing)|unclassified				PWY-3841: folate transformations II|unclassified			PWY-6151: S-adenosyl-L-methionine cycle I|unclassified		PWY-6151: S-adenosyl-L-methionine cycle I|unclassified				PWY-5177: glutaryl-CoA degradation|unclassified
PWY-6527: stachyose degradation|unclassified		PWY-6527: stachyose degradation|unclassified				PWY-4242: pantothenate and coenzyme A biosynthesis III|unclassified			PWY-6163: chorismate biosynthesis from 3-dehydroquinate|unclassified		PWY-6163: chorismate biosynthesis from 3-dehydroquinate|unclassified				PWY-5347: superpathway of L-methionine biosynthesis (transsulfuration)|unclassified
PWY-6609: adenine and adenosine salvage III|unclassified		PWY-6609: adenine and adenosine salvage III|unclassified				PWY-5097: L-lysine biosynthesis VI|g__Faecalibacterium.s__Faecalibacterium_prausnitzii			PWY-6168: flavin biosynthesis III (fungi)|unclassified		PWY-6168: flavin biosynthesis III (fungi)|unclassified				PWY-5505: L-glutamate and L-glutamine biosynthesis|unclassified
PWY-6700: queuosine biosynthesis|unclassified		PWY-6700: queuosine biosynthesis|unclassified				PWY-5097: L-lysine biosynthesis VI|unclassified			PWY-6277: superpathway of 5-aminoimidazole ribonucleotide biosynthesis|unclassified		PWY-6277: superpathway of 5-aminoimidazole ribonucleotide biosynthesis|unclassified				PWY-5659: GDP-mannose biosynthesis|unclassified
PWY-6737: starch degradation V|unclassified		PWY-6737: starch degradation V|unclassified				PWY-5100: pyruvate fermentation to acetate and lactate II|unclassified			PWY-6317: galactose degradation I (Leloir pathway)|unclassified		PWY-6317: galactose degradation I (Leloir pathway)|unclassified				PWY-5667: CDP-diacylglycerol biosynthesis I|g__Faecalibacterium.s__Faecalibacterium_prausnitzii
PWY-6936: seleno-amino acid biosynthesis|unclassified		PWY-6936: seleno-amino acid biosynthesis|unclassified				PWY-5101: L-isoleucine biosynthesis II|unclassified			PWY-6385: peptidoglycan biosynthesis III (mycobacteria)|unclassified		PWY-6385: peptidoglycan biosynthesis III (mycobacteria)|unclassified				PWY-5667: CDP-diacylglycerol biosynthesis I|unclassified
PWY-7111: pyruvate fermentation to isobutanol (engineered)|unclassified		PWY-7111: pyruvate fermentation to isobutanol (engineered)|unclassified				PWY-5103: L-isoleucine biosynthesis III|g__Faecalibacterium.s__Faecalibacterium_prausnitzii			PWY-6386: UDP-N-acetylmuramoyl-pentapeptide biosynthesis II (lysine-containing)|unclassified		PWY-6386: UDP-N-acetylmuramoyl-pentapeptide biosynthesis II (lysine-containing)|unclassified				PWY-5686: UMP biosynthesis|g__Faecalibacterium.s__Faecalibacterium_prausnitzii
PWY-7199: pyrimidine deoxyribonucleosides salvage|unclassified		PWY-7199: pyrimidine deoxyribonucleosides salvage|unclassified				PWY-5103: L-isoleucine biosynthesis III|unclassified			PWY-6387: UDP-N-acetylmuramoyl-pentapeptide biosynthesis I (meso-diaminopimelate containing)|unclassified		PWY-6387: UDP-N-acetylmuramoyl-pentapeptide biosynthesis I (meso-diaminopimelate containing)|unclassified				PWY-5686: UMP biosynthesis|unclassified
PWY-7208: superpathway of pyrimidine nucleobases salvage|unclassified		PWY-7208: superpathway of pyrimidine nucleobases salvage|unclassified				PWY-5104: L-isoleucine biosynthesis IV|unclassified			PWY-6527: stachyose degradation|unclassified		PWY-6527: stachyose degradation|unclassified				PWY-5695: urate biosynthesis/inosine 5'-phosphate degradation|unclassified
PWY-7219: adenosine ribonucleotides de novo biosynthesis|unclassified		PWY-7219: adenosine ribonucleotides de novo biosynthesis|unclassified				PWY-5177: glutaryl-CoA degradation|g__Faecalibacterium.s__Faecalibacterium_prausnitzii			PWY-6608: guanosine nucleotides degradation III|unclassified		PWY-6608: guanosine nucleotides degradation III|unclassified				PWY-5973: cis-vaccenate biosynthesis|unclassified
PWY-7221: guanosine ribonucleotides de novo biosynthesis|unclassified		PWY-7221: guanosine ribonucleotides de novo biosynthesis|unclassified				PWY-5177: glutaryl-CoA degradation|unclassified			PWY-6609: adenine and adenosine salvage III|unclassified		PWY-6609: adenine and adenosine salvage III|unclassified				PWY-6121: 5-aminoimidazole ribonucleotide biosynthesis I|g__Faecalibacterium.s__Faecalibacterium_prausnitzii
PWY-7229: superpathway of adenosine nucleotides de novo biosynthesis I|unclassified		PWY-7229: superpathway of adenosine nucleotides de novo biosynthesis I|unclassified				PWY-5347: superpathway of L-methionine biosynthesis (transsulfuration)|unclassified			PWY-6700: queuosine biosynthesis|unclassified		PWY-6700: queuosine biosynthesis|unclassified				PWY-6121: 5-aminoimidazole ribonucleotide biosynthesis I|unclassified
PWY-7242: D-fructuronate degradation|unclassified		PWY-7242: D-fructuronate degradation|unclassified				PWY-5505: L-glutamate and L-glutamine biosynthesis|unclassified			PWY-6737: starch degradation V|unclassified		PWY-6737: starch degradation V|unclassified				PWY-6122: 5-aminoimidazole ribonucleotide biosynthesis II|g__Faecalibacterium.s__Faecalibacterium_prausnitzii
PWY-724: superpathway of L-lysine, L-threonine and L-methionine biosynthesis II|unclassified		PWY-724: superpathway of L-lysine, L-threonine and L-methionine biosynthesis II|unclassified				PWY-5659: GDP-mannose biosynthesis|unclassified			PWY-6936: seleno-amino acid biosynthesis|unclassified		PWY-6936: seleno-amino acid biosynthesis|unclassified				PWY-6122: 5-aminoimidazole ribonucleotide biosynthesis II|unclassified
PWY-7323: superpathway of GDP-mannose-derived O-antigen building blocks biosynthesis|unclassified		PWY-7323: superpathway of GDP-mannose-derived O-antigen building blocks biosynthesis|unclassified				PWY-5667: CDP-diacylglycerol biosynthesis I|g__Eubacterium.s__Eubacterium_rectale			PWY-7111: pyruvate fermentation to isobutanol (engineered)|unclassified		PWY-7111: pyruvate fermentation to isobutanol (engineered)|unclassified				PWY-6123: inosine-5'-phosphate biosynthesis I|unclassified
PWY-7383: anaerobic energy metabolism (invertebrates, cytosol)|unclassified		PWY-7383: anaerobic energy metabolism (invertebrates, cytosol)|unclassified				PWY-5667: CDP-diacylglycerol biosynthesis I|g__Faecalibacterium.s__Faecalibacterium_prausnitzii			PWY-7199: pyrimidine deoxyribonucleosides salvage|unclassified		PWY-7199: pyrimidine deoxyribonucleosides salvage|unclassified				PWY-6124: inosine-5'-phosphate biosynthesis II|unclassified
PWY-7400: L-arginine biosynthesis IV (archaebacteria)|unclassified		PWY-7400: L-arginine biosynthesis IV (archaebacteria)|unclassified				PWY-5667: CDP-diacylglycerol biosynthesis I|unclassified			PWY-7208: superpathway of pyrimidine nucleobases salvage|unclassified		PWY-7208: superpathway of pyrimidine nucleobases salvage|unclassified				PWY-6151: S-adenosyl-L-methionine cycle I|g__Faecalibacterium.s__Faecalibacterium_prausnitzii
PWY-7560: methylerythritol phosphate pathway II|unclassified		PWY-7560: methylerythritol phosphate pathway II|unclassified				PWY-5686: UMP biosynthesis|g__Faecalibacterium.s__Faecalibacterium_prausnitzii			PWY-7219: adenosine ribonucleotides de novo biosynthesis|unclassified		PWY-7219: adenosine ribonucleotides de novo biosynthesis|unclassified				PWY-6151: S-adenosyl-L-methionine cycle I|unclassified
PWY-7663: gondoate biosynthesis (anaerobic)|unclassified		PWY-7663: gondoate biosynthesis (anaerobic)|unclassified				PWY-5686: UMP biosynthesis|unclassified			PWY-7221: guanosine ribonucleotides de novo biosynthesis|unclassified		PWY-7221: guanosine ribonucleotides de novo biosynthesis|unclassified				PWY-6163: chorismate biosynthesis from 3-dehydroquinate|unclassified
PWY0-1061: superpathway of L-alanine biosynthesis|unclassified		PWY0-1061: superpathway of L-alanine biosynthesis|unclassified				PWY-5695: urate biosynthesis/inosine 5'-phosphate degradation|g__Faecalibacterium.s__Faecalibacterium_prausnitzii			PWY-7229: superpathway of adenosine nucleotides de novo biosynthesis I|unclassified		PWY-7229: superpathway of adenosine nucleotides de novo biosynthesis I|unclassified				PWY-6168: flavin biosynthesis III (fungi)|unclassified
PWY0-1296: purine ribonucleosides degradation|unclassified		PWY0-1296: purine ribonucleosides degradation|unclassified				PWY-5695: urate biosynthesis/inosine 5'-phosphate degradation|unclassified			PWY-7242: D-fructuronate degradation|unclassified		PWY-7242: D-fructuronate degradation|unclassified				PWY-621: sucrose degradation III (sucrose invertase)|g__Faecalibacterium.s__Faecalibacterium_prausnitzii
PWY0-1297: superpathway of purine deoxyribonucleosides degradation|unclassified		PWY0-1297: superpathway of purine deoxyribonucleosides degradation|unclassified				PWY-5973: cis-vaccenate biosynthesis|unclassified			PWY-724: superpathway of L-lysine, L-threonine and L-methionine biosynthesis II|unclassified		PWY-724: superpathway of L-lysine, L-threonine and L-methionine biosynthesis II|unclassified				PWY-6277: superpathway of 5-aminoimidazole ribonucleotide biosynthesis|g__Faecalibacterium.s__Faecalibacterium_prausnitzii
PWY0-1319: CDP-diacylglycerol biosynthesis II|unclassified		PWY0-1319: CDP-diacylglycerol biosynthesis II|unclassified				PWY-6121: 5-aminoimidazole ribonucleotide biosynthesis I|g__Faecalibacterium.s__Faecalibacterium_prausnitzii			PWY-7315: dTDP-N-acetylthomosamine biosynthesis|unclassified		PWY-7315: dTDP-N-acetylthomosamine biosynthesis|unclassified				PWY-6277: superpathway of 5-aminoimidazole ribonucleotide biosynthesis|unclassified
PWY0-1586: peptidoglycan maturation (meso-diaminopimelate containing)|unclassified		PWY0-1586: peptidoglycan maturation (meso-diaminopimelate containing)|unclassified				PWY-6121: 5-aminoimidazole ribonucleotide biosynthesis I|unclassified			PWY-7323: superpathway of GDP-mannose-derived O-antigen building blocks biosynthesis|unclassified		PWY-7323: superpathway of GDP-mannose-derived O-antigen building blocks biosynthesis|unclassified				PWY-6317: galactose degradation I (Leloir pathway)|g__Faecalibacterium.s__Faecalibacterium_prausnitzii
PWY66-422: D-galactose degradation V (Leloir pathway)|unclassified		PWY66-422: D-galactose degradation V (Leloir pathway)|unclassified				PWY-6122: 5-aminoimidazole ribonucleotide biosynthesis II|g__Faecalibacterium.s__Faecalibacterium_prausnitzii			PWY-7383: anaerobic energy metabolism (invertebrates, cytosol)|unclassified		PWY-7383: anaerobic energy metabolism (invertebrates, cytosol)|unclassified				PWY-6317: galactose degradation I (Leloir pathway)|unclassified
PYRIDNUCSYN-PWY: NAD biosynthesis I (from aspartate)|unclassified		PYRIDNUCSYN-PWY: NAD biosynthesis I (from aspartate)|unclassified				PWY-6122: 5-aminoimidazole ribonucleotide biosynthesis II|unclassified			PWY-7388: octanoyl-[acyl-carrier protein] biosynthesis (mitochondria, yeast)|unclassified		PWY-7388: octanoyl-[acyl-carrier protein] biosynthesis (mitochondria, yeast)|unclassified				PWY-6385: peptidoglycan biosynthesis III (mycobacteria)|g__Faecalibacterium.s__Faecalibacterium_prausnitzii
SER-GLYSYN-PWY: superpathway of L-serine and glycine biosynthesis I|unclassified		SER-GLYSYN-PWY: superpathway of L-serine and glycine biosynthesis I|unclassified				PWY-6123: inosine-5'-phosphate biosynthesis I|unclassified			PWY-7400: L-arginine biosynthesis IV (archaebacteria)|unclassified		PWY-7400: L-arginine biosynthesis IV (archaebacteria)|unclassified				PWY-6385: peptidoglycan biosynthesis III (mycobacteria)|unclassified
THRESYN-PWY: superpathway of L-threonine biosynthesis|unclassified		THRESYN-PWY: superpathway of L-threonine biosynthesis|unclassified				PWY-6124: inosine-5'-phosphate biosynthesis II|unclassified			PWY-7560: methylerythritol phosphate pathway II|unclassified		PWY-7560: methylerythritol phosphate pathway II|unclassified				PWY-6386: UDP-N-acetylmuramoyl-pentapeptide biosynthesis II (lysine-containing)|g__Faecalibacterium.s__Faecalibacterium_prausnitzii
TRNA-CHARGING-PWY: tRNA charging|unclassified		TRNA-CHARGING-PWY: tRNA charging|unclassified				PWY-6151: S-adenosyl-L-methionine cycle I|g__Faecalibacterium.s__Faecalibacterium_prausnitzii			PWY-7663: gondoate biosynthesis (anaerobic)|unclassified		PWY-7663: gondoate biosynthesis (anaerobic)|unclassified				PWY-6386: UDP-N-acetylmuramoyl-pentapeptide biosynthesis II (lysine-containing)|unclassified
UNINTEGRATED|unclassified		UNINTEGRATED|unclassified				PWY-6151: S-adenosyl-L-methionine cycle I|unclassified			PWY0-1061: superpathway of L-alanine biosynthesis|unclassified		PWY0-1061: superpathway of L-alanine biosynthesis|unclassified				PWY-6387: UDP-N-acetylmuramoyl-pentapeptide biosynthesis I (meso-diaminopimelate containing)|g__Faecalibacterium.s__Faecalibacterium_prausnitzii
VALSYN-PWY: L-valine biosynthesis|unclassified		VALSYN-PWY: L-valine biosynthesis|unclassified				PWY-6163: chorismate biosynthesis from 3-dehydroquinate|unclassified			PWY0-1296: purine ribonucleosides degradation|unclassified		PWY0-1296: purine ribonucleosides degradation|unclassified				PWY-6387: UDP-N-acetylmuramoyl-pentapeptide biosynthesis I (meso-diaminopimelate containing)|unclassified
PWY-4981: L-proline biosynthesis II (from arginine)|unclassified		PWY-4981: L-proline biosynthesis II (from arginine)|unclassified				PWY-6168: flavin biosynthesis III (fungi)|unclassified			PWY0-1297: superpathway of purine deoxyribonucleosides degradation|unclassified		PWY0-1297: superpathway of purine deoxyribonucleosides degradation|unclassified				PWY-6527: stachyose degradation|unclassified
PWY-5154: L-arginine biosynthesis III (via N-acetyl-L-citrulline)|unclassified		PWY-5154: L-arginine biosynthesis III (via N-acetyl-L-citrulline)|unclassified				PWY-621: sucrose degradation III (sucrose invertase)|g__Faecalibacterium.s__Faecalibacterium_prausnitzii			PWY0-1319: CDP-diacylglycerol biosynthesis II|unclassified		PWY0-1319: CDP-diacylglycerol biosynthesis II|unclassified				PWY-6608: guanosine nucleotides degradation III|unclassified
PWY-6125: superpathway of guanosine nucleotides de novo biosynthesis II|unclassified		PWY-6125: superpathway of guanosine nucleotides de novo biosynthesis II|unclassified				PWY-6277: superpathway of 5-aminoimidazole ribonucleotide biosynthesis|g__Faecalibacterium.s__Faecalibacterium_prausnitzii			PWY0-1586: peptidoglycan maturation (meso-diaminopimelate containing)|unclassified		PWY0-1586: peptidoglycan maturation (meso-diaminopimelate containing)|unclassified				PWY-6609: adenine and adenosine salvage III|unclassified
PWY-6126: superpathway of adenosine nucleotides de novo biosynthesis II|unclassified		PWY-6126: superpathway of adenosine nucleotides de novo biosynthesis II|unclassified				PWY-6277: superpathway of 5-aminoimidazole ribonucleotide biosynthesis|unclassified			PWY66-422: D-galactose degradation V (Leloir pathway)|unclassified		PWY66-422: D-galactose degradation V (Leloir pathway)|unclassified				PWY-6700: queuosine biosynthesis|unclassified
PWY-6507: 4-deoxy-L-threo-hex-4-enopyranuronate degradation|unclassified		PWY-6507: 4-deoxy-L-threo-hex-4-enopyranuronate degradation|unclassified				PWY-6282: palmitoleate biosynthesis I (from (5Z)-dodec-5-enoate)|unclassified			PYRIDNUCSYN-PWY: NAD biosynthesis I (from aspartate)|unclassified		PYRIDNUCSYN-PWY: NAD biosynthesis I (from aspartate)|unclassified				PWY-6737: starch degradation V|g__Faecalibacterium.s__Faecalibacterium_prausnitzii
PWY-7187: pyrimidine deoxyribonucleotides de novo biosynthesis II|unclassified		PWY-7187: pyrimidine deoxyribonucleotides de novo biosynthesis II|unclassified				PWY-6317: galactose degradation I (Leloir pathway)|g__Faecalibacterium.s__Faecalibacterium_prausnitzii			SER-GLYSYN-PWY: superpathway of L-serine and glycine biosynthesis I|unclassified		SER-GLYSYN-PWY: superpathway of L-serine and glycine biosynthesis I|unclassified				PWY-6737: starch degradation V|unclassified
PWY-7197: pyrimidine deoxyribonucleotide phosphorylation|unclassified		PWY-7197: pyrimidine deoxyribonucleotide phosphorylation|unclassified				PWY-6317: galactose degradation I (Leloir pathway)|unclassified			THRESYN-PWY: superpathway of L-threonine biosynthesis|unclassified		THRESYN-PWY: superpathway of L-threonine biosynthesis|unclassified				PWY-6936: seleno-amino acid biosynthesis|unclassified
PWY-7220: adenosine deoxyribonucleotides de novo biosynthesis II|unclassified		PWY-7220: adenosine deoxyribonucleotides de novo biosynthesis II|unclassified				PWY-6385: peptidoglycan biosynthesis III (mycobacteria)|g__Faecalibacterium.s__Faecalibacterium_prausnitzii			TRNA-CHARGING-PWY: tRNA charging|unclassified		TRNA-CHARGING-PWY: tRNA charging|unclassified				PWY-7111: pyruvate fermentation to isobutanol (engineered)|g__Faecalibacterium.s__Faecalibacterium_prausnitzii
PWY-7222: guanosine deoxyribonucleotides de novo biosynthesis II|unclassified		PWY-7222: guanosine deoxyribonucleotides de novo biosynthesis II|unclassified				PWY-6385: peptidoglycan biosynthesis III (mycobacteria)|unclassified			TRPSYN-PWY: L-tryptophan biosynthesis|unclassified		TRPSYN-PWY: L-tryptophan biosynthesis|unclassified				PWY-7111: pyruvate fermentation to isobutanol (engineered)|unclassified
PWY-7228: superpathway of guanosine nucleotides de novo biosynthesis I|unclassified		PWY-7228: superpathway of guanosine nucleotides de novo biosynthesis I|unclassified				PWY-6386: UDP-N-acetylmuramoyl-pentapeptide biosynthesis II (lysine-containing)|g__Faecalibacterium.s__Faecalibacterium_prausnitzii			UNINTEGRATED|unclassified		UNINTEGRATED|unclassified				PWY-7199: pyrimidine deoxyribonucleosides salvage|unclassified
PWY-7237: myo-, chiro- and scillo-inositol degradation|unclassified		PWY-7237: myo-, chiro- and scillo-inositol degradation|unclassified				PWY-6386: UDP-N-acetylmuramoyl-pentapeptide biosynthesis II (lysine-containing)|unclassified			VALSYN-PWY: L-valine biosynthesis|unclassified		VALSYN-PWY: L-valine biosynthesis|unclassified				PWY-7208: superpathway of pyrimidine nucleobases salvage|unclassified
PWY0-162: superpathway of pyrimidine ribonucleotides de novo biosynthesis|unclassified		PWY0-162: superpathway of pyrimidine ribonucleotides de novo biosynthesis|unclassified				PWY-6387: UDP-N-acetylmuramoyl-pentapeptide biosynthesis I (meso-diaminopimelate containing)|g__Faecalibacterium.s__Faecalibacterium_prausnitzii					ANAGLYCOLYSIS-PWY: glycolysis III (from glucose)|g__Faecalibacterium.s__Faecalibacterium_prausnitzii				PWY-7219: adenosine ribonucleotides de novo biosynthesis|g__Faecalibacterium.s__Faecalibacterium_prausnitzii
		ANAGLYCOLYSIS-PWY: glycolysis III (from glucose)|g__Faecalibacterium.s__Faecalibacterium_prausnitzii				PWY-6387: UDP-N-acetylmuramoyl-pentapeptide biosynthesis I (meso-diaminopimelate containing)|unclassified					BRANCHED-CHAIN-AA-SYN-PWY: superpathway of branched amino acid biosynthesis|g__Faecalibacterium.s__Faecalibacterium_prausnitzii				PWY-7219: adenosine ribonucleotides de novo biosynthesis|unclassified
		BRANCHED-CHAIN-AA-SYN-PWY: superpathway of branched amino acid biosynthesis|g__Faecalibacterium.s__Faecalibacterium_prausnitzii				PWY-6527: stachyose degradation|unclassified					CALVIN-PWY: Calvin-Benson-Bassham cycle|g__Faecalibacterium.s__Faecalibacterium_prausnitzii				PWY-7221: guanosine ribonucleotides de novo biosynthesis|g__Faecalibacterium.s__Faecalibacterium_prausnitzii
		CALVIN-PWY: Calvin-Benson-Bassham cycle|g__Faecalibacterium.s__Faecalibacterium_prausnitzii				PWY-6608: guanosine nucleotides degradation III|unclassified					DTDPRHAMSYN-PWY: dTDP-L-rhamnose biosynthesis I|g__Faecalibacterium.s__Faecalibacterium_prausnitzii				PWY-7221: guanosine ribonucleotides de novo biosynthesis|unclassified
		DTDPRHAMSYN-PWY: dTDP-L-rhamnose biosynthesis I|g__Faecalibacterium.s__Faecalibacterium_prausnitzii				PWY-6609: adenine and adenosine salvage III|unclassified					GALACTUROCAT-PWY: D-galacturonate degradation I|g__Faecalibacterium.s__Faecalibacterium_prausnitzii				PWY-7229: superpathway of adenosine nucleotides de novo biosynthesis I|unclassified
		GALACTUROCAT-PWY: D-galacturonate degradation I|g__Faecalibacterium.s__Faecalibacterium_prausnitzii				PWY-6700: queuosine biosynthesis|unclassified					HISTSYN-PWY: L-histidine biosynthesis|g__Faecalibacterium.s__Faecalibacterium_prausnitzii				PWY-724: superpathway of L-lysine, L-threonine and L-methionine biosynthesis II|unclassified
		HISTSYN-PWY: L-histidine biosynthesis|g__Faecalibacterium.s__Faecalibacterium_prausnitzii				PWY-6737: starch degradation V|g__Faecalibacterium.s__Faecalibacterium_prausnitzii					ILEUSYN-PWY: L-isoleucine biosynthesis I (from threonine)|g__Faecalibacterium.s__Faecalibacterium_prausnitzii				PWY-7242: D-fructuronate degradation|unclassified
		ILEUSYN-PWY: L-isoleucine biosynthesis I (from threonine)|g__Faecalibacterium.s__Faecalibacterium_prausnitzii				PWY-6737: starch degradation V|unclassified					PWY-1042: glycolysis IV (plant cytosol)|g__Faecalibacterium.s__Faecalibacterium_prausnitzii				PWY-7315: dTDP-N-acetylthomosamine biosynthesis|unclassified
		PWY-1042: glycolysis IV (plant cytosol)|g__Faecalibacterium.s__Faecalibacterium_prausnitzii				PWY-6897: thiamin salvage II|unclassified					PWY-5097: L-lysine biosynthesis VI|g__Faecalibacterium.s__Faecalibacterium_prausnitzii				PWY-7323: superpathway of GDP-mannose-derived O-antigen building blocks biosynthesis|unclassified
		PWY-5097: L-lysine biosynthesis VI|g__Faecalibacterium.s__Faecalibacterium_prausnitzii				PWY-6936: seleno-amino acid biosynthesis|unclassified					PWY-5103: L-isoleucine biosynthesis III|g__Faecalibacterium.s__Faecalibacterium_prausnitzii				PWY-7383: anaerobic energy metabolism (invertebrates, cytosol)|unclassified
		PWY-5103: L-isoleucine biosynthesis III|g__Faecalibacterium.s__Faecalibacterium_prausnitzii				PWY-7111: pyruvate fermentation to isobutanol (engineered)|g__Faecalibacterium.s__Faecalibacterium_prausnitzii					PWY-5177: glutaryl-CoA degradation|g__Faecalibacterium.s__Faecalibacterium_prausnitzii				PWY-7388: octanoyl-[acyl-carrier protein] biosynthesis (mitochondria, yeast)|unclassified
		PWY-5177: glutaryl-CoA degradation|g__Faecalibacterium.s__Faecalibacterium_prausnitzii				PWY-7111: pyruvate fermentation to isobutanol (engineered)|unclassified					PWY-5667: CDP-diacylglycerol biosynthesis I|g__Faecalibacterium.s__Faecalibacterium_prausnitzii				PWY-7400: L-arginine biosynthesis IV (archaebacteria)|unclassified
		PWY-5667: CDP-diacylglycerol biosynthesis I|g__Faecalibacterium.s__Faecalibacterium_prausnitzii				PWY-7199: pyrimidine deoxyribonucleosides salvage|unclassified					PWY-5686: UMP biosynthesis|g__Faecalibacterium.s__Faecalibacterium_prausnitzii				PWY-7560: methylerythritol phosphate pathway II|unclassified
		PWY-5686: UMP biosynthesis|g__Faecalibacterium.s__Faecalibacterium_prausnitzii				PWY-7208: superpathway of pyrimidine nucleobases salvage|unclassified					PWY-6121: 5-aminoimidazole ribonucleotide biosynthesis I|g__Faecalibacterium.s__Faecalibacterium_prausnitzii				PWY-7663: gondoate biosynthesis (anaerobic)|unclassified
		PWY-6121: 5-aminoimidazole ribonucleotide biosynthesis I|g__Faecalibacterium.s__Faecalibacterium_prausnitzii				PWY-7219: adenosine ribonucleotides de novo biosynthesis|g__Eubacterium.s__Eubacterium_rectale					PWY-6122: 5-aminoimidazole ribonucleotide biosynthesis II|g__Faecalibacterium.s__Faecalibacterium_prausnitzii				PWY0-1061: superpathway of L-alanine biosynthesis|unclassified
		PWY-6122: 5-aminoimidazole ribonucleotide biosynthesis II|g__Faecalibacterium.s__Faecalibacterium_prausnitzii				PWY-7219: adenosine ribonucleotides de novo biosynthesis|g__Faecalibacterium.s__Faecalibacterium_prausnitzii					PWY-6277: superpathway of 5-aminoimidazole ribonucleotide biosynthesis|g__Faecalibacterium.s__Faecalibacterium_prausnitzii				PWY0-1296: purine ribonucleosides degradation|g__Faecalibacterium.s__Faecalibacterium_prausnitzii
		PWY-6277: superpathway of 5-aminoimidazole ribonucleotide biosynthesis|g__Faecalibacterium.s__Faecalibacterium_prausnitzii				PWY-7219: adenosine ribonucleotides de novo biosynthesis|unclassified					PWY-6317: galactose degradation I (Leloir pathway)|g__Faecalibacterium.s__Faecalibacterium_prausnitzii				PWY0-1296: purine ribonucleosides degradation|unclassified
		PWY-6317: galactose degradation I (Leloir pathway)|g__Faecalibacterium.s__Faecalibacterium_prausnitzii				PWY-7221: guanosine ribonucleotides de novo biosynthesis|g__Faecalibacterium.s__Faecalibacterium_prausnitzii					PWY-6387: UDP-N-acetylmuramoyl-pentapeptide biosynthesis I (meso-diaminopimelate containing)|g__Faecalibacterium.s__Faecalibacterium_prausnitzii				PWY0-1297: superpathway of purine deoxyribonucleosides degradation|unclassified
		PWY-6387: UDP-N-acetylmuramoyl-pentapeptide biosynthesis I (meso-diaminopimelate containing)|g__Faecalibacterium.s__Faecalibacterium_prausnitzii				PWY-7221: guanosine ribonucleotides de novo biosynthesis|unclassified					PWY-6737: starch degradation V|g__Faecalibacterium.s__Faecalibacterium_prausnitzii				PWY0-1319: CDP-diacylglycerol biosynthesis II|g__Faecalibacterium.s__Faecalibacterium_prausnitzii
		PWY-6737: starch degradation V|g__Faecalibacterium.s__Faecalibacterium_prausnitzii				PWY-7229: superpathway of adenosine nucleotides de novo biosynthesis I|unclassified					PWY-7111: pyruvate fermentation to isobutanol (engineered)|g__Faecalibacterium.s__Faecalibacterium_prausnitzii				PWY0-1319: CDP-diacylglycerol biosynthesis II|unclassified
		PWY-7111: pyruvate fermentation to isobutanol (engineered)|g__Faecalibacterium.s__Faecalibacterium_prausnitzii				PWY-7242: D-fructuronate degradation|unclassified					PWY-7219: adenosine ribonucleotides de novo biosynthesis|g__Faecalibacterium.s__Faecalibacterium_prausnitzii				PWY0-1586: peptidoglycan maturation (meso-diaminopimelate containing)|unclassified
		PWY-7219: adenosine ribonucleotides de novo biosynthesis|g__Faecalibacterium.s__Faecalibacterium_prausnitzii				PWY-724: superpathway of L-lysine, L-threonine and L-methionine biosynthesis II|unclassified					PWY0-1296: purine ribonucleosides degradation|g__Faecalibacterium.s__Faecalibacterium_prausnitzii				PWY66-422: D-galactose degradation V (Leloir pathway)|g__Faecalibacterium.s__Faecalibacterium_prausnitzii
		PWY0-1296: purine ribonucleosides degradation|g__Faecalibacterium.s__Faecalibacterium_prausnitzii				PWY-7315: dTDP-N-acetylthomosamine biosynthesis|unclassified					PWY0-1319: CDP-diacylglycerol biosynthesis II|g__Faecalibacterium.s__Faecalibacterium_prausnitzii				PWY66-422: D-galactose degradation V (Leloir pathway)|unclassified
		PWY0-1319: CDP-diacylglycerol biosynthesis II|g__Faecalibacterium.s__Faecalibacterium_prausnitzii				PWY-7357: thiamin formation from pyrithiamine and oxythiamine (yeast)|unclassified					PWY66-422: D-galactose degradation V (Leloir pathway)|g__Faecalibacterium.s__Faecalibacterium_prausnitzii				PYRIDNUCSYN-PWY: NAD biosynthesis I (from aspartate)|unclassified
		PWY66-422: D-galactose degradation V (Leloir pathway)|g__Faecalibacterium.s__Faecalibacterium_prausnitzii				PWY-7388: octanoyl-[acyl-carrier protein] biosynthesis (mitochondria, yeast)|unclassified					UNINTEGRATED|g__Faecalibacterium.s__Faecalibacterium_prausnitzii				SER-GLYSYN-PWY: superpathway of L-serine and glycine biosynthesis I|unclassified
		UNINTEGRATED|g__Faecalibacterium.s__Faecalibacterium_prausnitzii				PWY-7400: L-arginine biosynthesis IV (archaebacteria)|unclassified					VALSYN-PWY: L-valine biosynthesis|g__Faecalibacterium.s__Faecalibacterium_prausnitzii				THRESYN-PWY: superpathway of L-threonine biosynthesis|unclassified
		VALSYN-PWY: L-valine biosynthesis|g__Faecalibacterium.s__Faecalibacterium_prausnitzii				PWY-7560: methylerythritol phosphate pathway II|unclassified									TRNA-CHARGING-PWY: tRNA charging|unclassified
						PWY-7663: gondoate biosynthesis (anaerobic)|unclassified									TRPSYN-PWY: L-tryptophan biosynthesis|unclassified
						PWY-7664: oleate biosynthesis IV (anaerobic)|unclassified									UNINTEGRATED|g__Faecalibacterium.s__Faecalibacterium_prausnitzii
						PWY0-1061: superpathway of L-alanine biosynthesis|unclassified									UNINTEGRATED|unclassified
						PWY0-1296: purine ribonucleosides degradation|g__Faecalibacterium.s__Faecalibacterium_prausnitzii									VALSYN-PWY: L-valine biosynthesis|g__Faecalibacterium.s__Faecalibacterium_prausnitzii
						PWY0-1296: purine ribonucleosides degradation|unclassified									VALSYN-PWY: L-valine biosynthesis|unclassified
						PWY0-1297: superpathway of purine deoxyribonucleosides degradation|unclassified
						PWY0-1298: superpathway of pyrimidine deoxyribonucleosides degradation|unclassified
						PWY0-1319: CDP-diacylglycerol biosynthesis II|g__Eubacterium.s__Eubacterium_rectale
						PWY0-1319: CDP-diacylglycerol biosynthesis II|g__Faecalibacterium.s__Faecalibacterium_prausnitzii
						PWY0-1319: CDP-diacylglycerol biosynthesis II|unclassified
						PWY0-1586: peptidoglycan maturation (meso-diaminopimelate containing)|g__Eubacterium.s__Eubacterium_rectale
						PWY0-1586: peptidoglycan maturation (meso-diaminopimelate containing)|unclassified
						PWY0-862: (5Z)-dodec-5-enoate biosynthesis|unclassified
						PWY66-422: D-galactose degradation V (Leloir pathway)|g__Faecalibacterium.s__Faecalibacterium_prausnitzii
						PWY66-422: D-galactose degradation V (Leloir pathway)|unclassified
						PWYG-321: mycolate biosynthesis|unclassified
						PYRIDNUCSYN-PWY: NAD biosynthesis I (from aspartate)|unclassified
						RIBOSYN2-PWY: flavin biosynthesis I (bacteria and plants)|g__Faecalibacterium.s__Faecalibacterium_prausnitzii
						SALVADEHYPOX-PWY: adenosine nucleotides degradation II|unclassified
						SER-GLYSYN-PWY: superpathway of L-serine and glycine biosynthesis I|unclassified
						THRESYN-PWY: superpathway of L-threonine biosynthesis|unclassified
						TRNA-CHARGING-PWY: tRNA charging|unclassified
						TRPSYN-PWY: L-tryptophan biosynthesis|unclassified
						UNINTEGRATED|g__Bacteroides.s__Bacteroides_uniformis
						UNINTEGRATED|g__Eubacterium.s__Eubacterium_rectale
						UNINTEGRATED|g__Faecalibacterium.s__Faecalibacterium_prausnitzii
						UNINTEGRATED|g__Parabacteroides.s__Parabacteroides_distasonis
						UNINTEGRATED|g__Parabacteroides.s__Parabacteroides_merdae
						UNINTEGRATED|unclassified
						VALSYN-PWY: L-valine biosynthesis|g__Faecalibacterium.s__Faecalibacterium_prausnitzii
						VALSYN-PWY: L-valine biosynthesis|unclassified
